# Supplementary material for: An Ultrasensitive Lateral Flow Immunoassay Based on Metal-Organic Framework-Decorated Polydopamine for Multiple Sulfonylureas Adulteration in Functional Foods
Source: MDPI journal article supplement (doi:10.3390/foods12030539), 2023-01-25
Supplement: s1 [file s1]

## Supplementary Materials

# An Ultrasensitive Lateral Flow Immunoassay Based on Metal-Organic Framework-Decorated Polydopamine for Multiple Sulfonylureas Adulteration in Functional Foods

Zixian He <sup>1,†</sup>, Zhiwei Liu <sup>1,†</sup>, Haihuan Xie <sup>2</sup>, Pengjie Luo <sup>3,\*</sup> and Xiangmei Li <sup>1,\*</sup>

<sup>1</sup> Guangdong Provincial Key Laboratory of Food Quality and Safety, College of Food Science, South China Agricultural University, Guangzhou 510642, China

<sup>2</sup> Wuzhou Institute for Food and Drug Control, Wuzhou 543099, China

<sup>3</sup> NHC Key Laboratory of Food Safety Risk Assessment, Chinese Academy of Medical Science Research Unit (No. 2019RU014), China National Center for Food Safety Risk Assessment, Beijing 100022, China

\* Correspondence: pengjieluo@cfsa.net.cn (P.L.); lixiangmei12@163.com (X.L.); Tel.: +86-20-8528-3925 (X.L.)

† These authors contributed equally to this work.

## **1. LC-MS/MS analysis**

The confirmation test was performed on LC-MS/MS (AB QTRAP4500 triple quadrupole mass spectrometer). Agilent Poroshell HPH-C18 (2.1 × 150 mm, 4 μm) was used to resolve the analytes. The column temperature was set to 40 °C. Mobile phase A was an aqueous solution containing 0.1% formic acid, and B was a 100% acetonitrile. All mobile phases were sonicated for 5 min before use. The gradient elution was 0~7 min, 20%~90% B; 7~8 min, 90% B; 8~10 min, 10% B. The mobile phase flow rate was set at 300 μL/min and the injection volume of the sample was 10 μL. For details of MS/MS parameters, please refer to Table S2.

## 2. Quantification of the coupling rate of PCN-224@PDA to Abs

The coupling rate of PCN-224@PDA to Abs was calculated by the following formula: Coupling rate (%) =  $\left(1 - \frac{M_r}{M_a}\right) \times 100\%$ .  $M_a$  was the amount of Abs added for coupling reaction.  $M_r$  was the remaining amount of Abs in supernatant after the preparation of PCN-224@PDA-Abs probes;  $M_r$  was calculated by multiplying the Abs concentration and total volume. The enzyme-linked immunosorbent assay (ELISA) was used to calculate the Abs concentration, and a calibration curve of Abs was determined by measuring different concentrations of anti-SUs mAbs (0.01-0.065  $\mu\text{g/mL}$ ) at the absorbance of 450 nm (Figure S1).

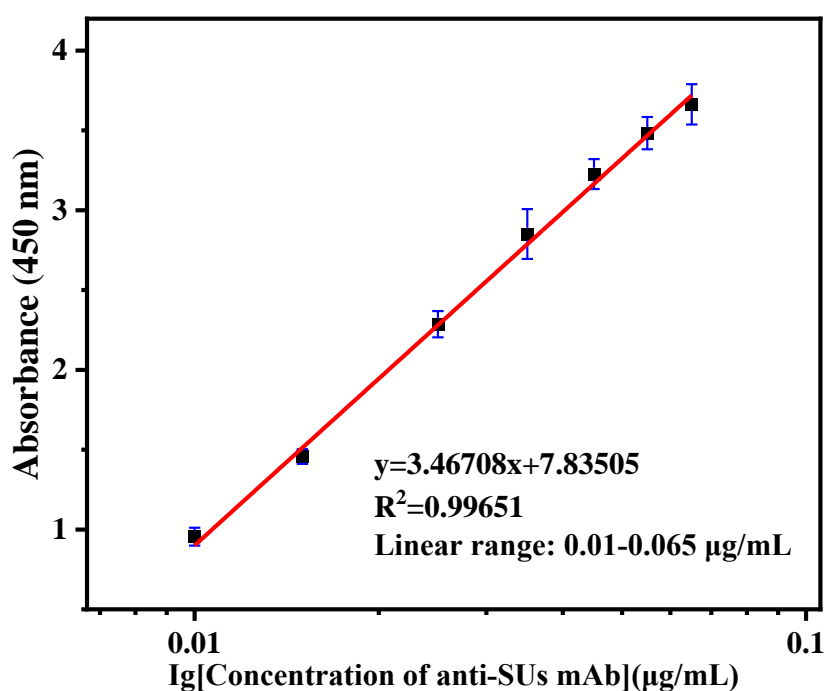

**Figure S1.** The calibration curve of anti-SUs mAbs.

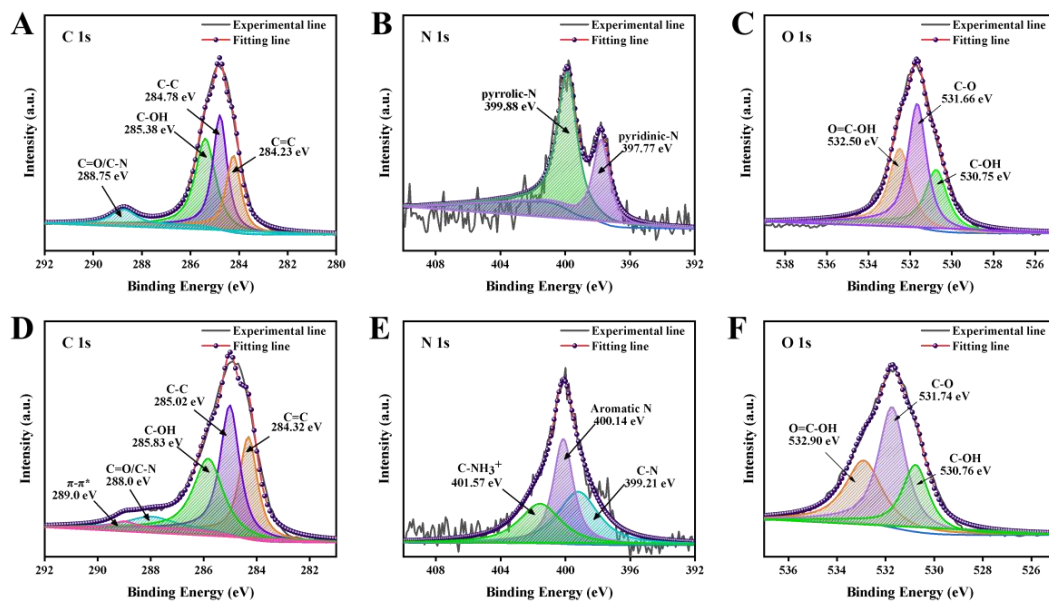

**Figure S2.** Corresponding XPS high-resolution spectra in the regions of C 1s, N 1s and O 1s. A-C: PCN-224; D-F: PCN-224@PDA. Compared with the PCN-224, the PCN-224@PDA displayed higher or lower binding energy in the regions of C 1s, N 1s, and O 1s. Further, the XPS spectrum in the region of C 1s for PCN-224@PDA showed a new  $\pi-\pi^*$  band at 289.0 eV, which was attributed to the aromatic ring of PDA loaded onto the PCN-224 surface through  $\pi-\pi$  stacking.

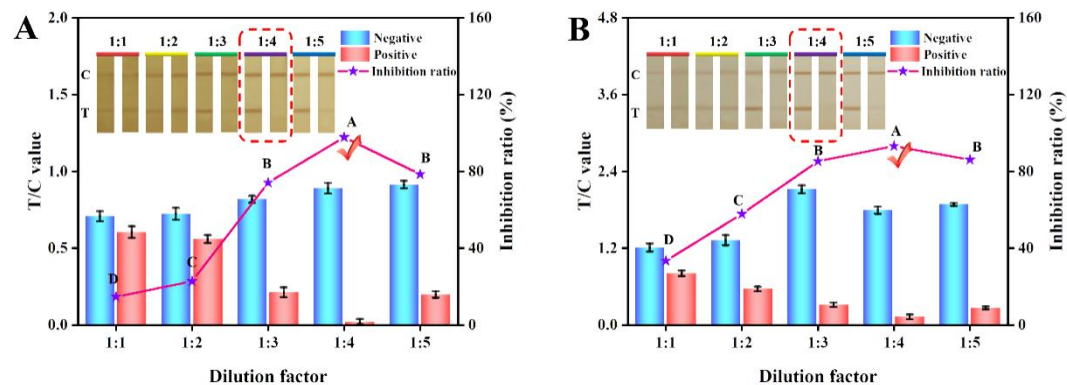

**Figure S3.** The influence of sample dilution factor on test strip results. A: Tea sample; B: Capsule sample. The concentration of GP was fixed at 45  $\mu\text{g/kg}$  and 70  $\mu\text{g/kg}$  in tea and capsule samples, respectively. Different letters represent statistical differences ( $p < 0.01$ ).

**Table S1.** Working conditions of the PCN-224@PDA-LFIA

| Working conditions                             | PCN-224@PDA-LFIA                                                                                                                                                                                                                            |
|------------------------------------------------|---------------------------------------------------------------------------------------------------------------------------------------------------------------------------------------------------------------------------------------------|
| Particle diameter and color of PCN-224         | 100 nm, dark purple                                                                                                                                                                                                                         |
| The polymerization time of PDA                 | 12 h                                                                                                                                                                                                                                        |
| The amount of DA                               | 12 mg                                                                                                                                                                                                                                       |
| the pH value for self-polymerization of DA     | 0.01 M Tris-HCl (pH 7.5)                                                                                                                                                                                                                    |
| Particle diameter and color of PCN-224@PDA     | 120 nm, brown                                                                                                                                                                                                                               |
| Concentration of immobilized antigen (SUs-OVA) | 0.3 mg/mL                                                                                                                                                                                                                                   |
| Concentration of goat anti-mouse IgG           | 0.15 mg/mL                                                                                                                                                                                                                                  |
| Coating buffer                                 | 0.02 M PB (pH 6.5)                                                                                                                                                                                                                          |
| The amount of Abs                              | 5 µg                                                                                                                                                                                                                                        |
| The coupling pH value                          | 0.02 M MES (pH 6.5)                                                                                                                                                                                                                         |
| The coupling time of Abs                       | 1 h                                                                                                                                                                                                                                         |
| Sample pad material                            | SB08                                                                                                                                                                                                                                        |
| Sample pad pretreatment solution               | 0.02 M PB (pH 7.4, 0.75 % Tween®-20, 0.5 % BSA, and 0.3% PVP)                                                                                                                                                                               |
| PCN-224@PDA-Abs probes resuspension            | 0.02 M PB (pH 7.4, 0.5% BSA, 0.5% Tween®-20, 5% sucrose, 0.2% PVP, and 0.03% ProClin™ 300)                                                                                                                                                  |
| Sample pretreatment                            | 1 g of sample was solubilized in 1 mL methanol and shaken for 3 min. After centrifugation at 10000×g for 5 min, the supernatant was filtered through a 0.22 µm organic filter membrane and then diluted five times with 0.02 M PB (pH 7.4). |

**Table S2.** The optimal MS/MS parameters for the detection of SUs

| Analyte | Precursor ion (m/z) | Product ion (m/z) | Declustering Potential (eV) | Collision energy (V) |
|---------|---------------------|-------------------|-----------------------------|----------------------|
| GP      | 446.2               | 320.9*            | 80.00                       | 18.00                |
|         | 446.2               | 437.0             | 80.00                       | 19.13                |
| GM      | 491.2               | 352.1*            | 110.00                      | 17.00                |
|         | 491.2               | 125.9             | 110.00                      | 34.28                |
| GB      | 494.1               | 368.9*            | 90.00                       | 17.00                |
|         | 494.1               | 168.8             | 90.00                       | 38.42                |
| TB      | 270.9               | 171.9*            | 66.00                       | 16.00                |
|         | 270.9               | 155.0             | 66.00                       | 25.89                |
| GQ      | 528.1               | 402.9*            | 93.00                       | 19.00                |
|         | 528.1               | 386.1             | 93.00                       | 28.25                |
| CB      | 272.3               | 156.0*            | 59.00                       | 19.80                |
|         | 272.3               | 74.1              | 59.00                       | 15.00                |
| GL      | 324.1               | 110.0*            | 81.00                       | 24.00                |
|         | 324.1               | 127.1             | 81.00                       | 23.00                |
| AH      | 325.1               | 243.0*            | 94.00                       | 15.00                |
|         | 325.1               | 119.0             | 94.00                       | 34.00                |
| TB      | 311.9               | 115*              | 86.00                       | 22.00                |
|         | 311.9               | 91.1              | 86.00                       | 40.00                |
| CPM     | 277.0               | 111.0*            | 56.40                       | 42.00                |
|         | 277.0               | 174.8             | 50.74                       | 20.00                |
| GBN     | 367.0               | 170.2*            | 63.08                       | 20.00                |
|         | 367.0               | 152.1             | 75.98                       | 26.00                |

\* Quantitative ion

**Table S3.** Cross-reactivity of icELISA and PCN-224@PDA-LFIA (n = 3)

| Analytes | icELISA                  | CR%   | PCN-224@PDA-LFIA         | CR%   |
|----------|--------------------------|-------|--------------------------|-------|
|          | IC <sub>50</sub> (μg/kg) |       | IC <sub>50</sub> (μg/kg) |       |
| GP       | 0.15                     | 100.0 | 5.78                     | 100.0 |
| GM       | 0.18                     | 83.3  | 9.05                     | 63.9  |
| GB       | 0.15                     | 100.0 | 14.49                    | 39.9  |
| TB       | 0.65                     | 23.1  | 31.51                    | 18.3  |
| GQ       | 0.22                     | 68.2  | 46.48                    | 12.4  |
| GL       | 1.17                     | 12.8  | 141.20                   | 4.1   |
| CB       | 0.88                     | 17.0  | 88.99                    | 6.5   |
| TLZ      | 2.53                     | 5.9   | 132.54                   | 4.4   |
| AH       | 3.25                     | 4.6   | 212.40                   | 2.7   |
| CPM      | 61.16                    | 0.2   | 4034.35                  | 0.1   |
| GBN      | 49.01                    | 0.3   | 2537.67                  | 0.2   |
| RGLN     | > 10,000                 | <0.01 | > 10,000                 | <0.01 |
| RGLT     | > 10,000                 | <0.01 | > 10,000                 | <0.01 |
| PF       | > 10,000                 | <0.01 | > 10,000                 | <0.01 |
| MFM      | > 10,000                 | <0.01 | > 10,000                 | <0.01 |



**Table S4.** Determination of SUs in commercial functional tea and capsule samples by PCN-224@PDA-LFIA and LC-MS/MS (n = 3)

| Sample No. | LC-MS/MS<br>( $\mu\text{g/kg}$ ) | CV% | PCN-224@PDA-LFIA<br>( $\mu\text{g/kg}$ ) | CV% |
|------------|----------------------------------|-----|------------------------------------------|-----|
| Tea1       | NA                               | -   | NA                                       | -   |
| Tea2       | NA                               | -   | NA                                       | -   |
| Tea3       | NA                               | -   | NA                                       | -   |
| Tea4       | NA                               | -   | NA                                       | -   |
| Tea5       | NA                               | -   | NA                                       | -   |
| Tea6       | NA                               | -   | NA                                       | -   |
| Tea7       | NA                               | -   | NA                                       | -   |
| Tea8       | NA                               | -   | NA                                       | -   |
| Tea9       | NA                               | -   | NA                                       | -   |
| Tea10      | NA                               | -   | NA                                       | -   |
| Capsule1   | NA                               | -   | NA                                       | -   |
| Capsule2   | NA                               | -   | NA                                       | -   |
| Capsule3   | NA                               | -   | NA                                       | -   |
| Capsule4   | NA                               | -   | NA                                       | -   |
| Capsule5   | NA                               | -   | NA                                       | -   |
| Capsule6   | NA                               | -   | NA                                       | -   |
| Capsule7   | NA                               | -   | NA                                       | -   |
| Capsule8   | NA                               | -   | NA                                       | -   |
| Capsule9   | NA                               | -   | NA                                       | -   |
| Capsule10  | NA                               | -   | NA                                       | -   |
